# Supplementary material
Source: publisher site journal article supplement (https://neobiota.pensoft.net/article/31650/download/suppl/31/)
Supplement: Supplementary file 1

**Supplementary materials for:**

**Consistency of impact assessment protocols for non-native species**

Pablo González-Moreno1*, Lorenzo Lazzaro2, Montserrat Vilà3, Cristina Preda4,5, Tim Adriaens6, Sven Bacher4, Giuseppe Brundu7, Gordon H Copp8, 9, Franz Essl10, Emili García-Berthou11, Stelios Katsanevakis12, Toril Loennechen Moen13, Frances E Lucy14, Wolfgang Nentwig15, Helen E Roy16, Greta Srėbalienė17, Venche Talgø18, Sonia Vanderhoeven19, Ana Andjelković20,21, Kęstutis Arbačiauskas22, Marie-Anne Auger-Rozenberg23, Mi-Jung Bae11,24, Michel Bariche25, Pieter Boets26, Mário Boieiro27, Paulo Alexandre Borges27, João Canning-Clode28,29,30, Frederico Cardigos31, Niki Chartosia32, Elizabeth Joanne Cottier-Cook33, Fabio Crocetta34, Bram D'hondt35, Bruno Foggi2, Swen Follak36, Belinda Gallardo37, Øivind Gammelmo38, Sylvaine Giakoumi39, Claudia Giuliani40, Fried Guillaume41, Lucija Šerić Jelaska42, Jonathan M Jeschke43,44,45, Miquel Jover46, Alejandro Juárez-Escario47, 48, Stefanos Kalogirou49, Aleksandra Kočić50, Eleni Kytinou51, Ciaran Laverty52, Vanessa Lozano7, Alberto Maceda-Veiga3, Elizabete Marchante53, Hélia Marchante53,54, Angeliki F Martinou55, Sandro Meyer56, Dan Michin57,58, Ana Montero-Castaño3, Maria Cristina Morais53,59, Carmen Morales-Rodriguez60, Nadia Muhthassim15, Zoltán Á Nagy61, Nikica Ogris62, Huseyin Onen63, Jan Pergl64, Riikka Puntila65, Wolfgang Rabitsch66, Triya Tessa Ramburn67, Carla Rego27, Fabian Reichenbach15, Carmen Romeralo68,69, Wolf-Christian Saul43,44,45, Gritta Schrader70, Rory Sheehan14, Predrag Simonović71, Marius Skolka5, António Onofre Soares72, Leif Sundheim18, Ali Serhan Tarkan73, Rumen Tomov74, Elena Tricarico2, Konstantinos Tsiamis75, Ahmet Uludağ76, Johan van Valkenburg77, Hugo Verreycken78, Anna Maria Vettraino79, Lluís Vilar46, Øystein Wiig80, Johanna Witzell69, Andrea Zanetta4,81, Marc Kenis82

*Corresponding author

1. CABI, Egham, UK
2. Department of Biology, University of Florence, Florence, Italy
3. Estación Biológica de Doñana (EBD-CSIC), Sevilla, Spain
4. University of Fribourg, Department of Biology, Fribourg, Switzerland
5. Ovidius University of Constanta, Department of Natural Sciences, Constanta, Romania
6. Research Institute for Nature and Forest (INBO), Brussels, Belgium
7. Department of Agriculture, University of Sassari, Sassari, Italy
8. Salmon & Freshwater Team, Cefas, Lowestoft, U.K.
9. Centre for Conservation Ecology and Environmental Science, Bournemouth University, Poole, U.K.
10. Division of Conservation, Vegetation and Landscape Ecology, University Vienna, Vienna, Austria
11. GRECO, Institute of Aquatic Ecology, University of Girona, Girona, Spain
12. University of the Aegean, Department of Marine Sciences, Mytilene, Greece
13. Norwegian Biodiversity Information Centre. Trondheim. Norway
14. CERIS, Institute of Technology, Sligo, Ireland
15. Institute of Ecology and Evolution, University of Bern, Bern, Switzerland
16. Centre for Ecology & Hydrology, Crowmarsh Gifford, UK
17. Marine Science and Technology Centre, Klaipėda University, Klaipėda, Lithuania
18. Norwegian Institute of Bioeconomy Research (NIBIO), Ås, Norway
19. Belgian Biodiversity Platform, Walloon Research Department for Nature and Agricultural Areas (DEMNA), Service Public de Wallonie, Gembloux, Belgium.
20. Institute for Plant Protection and Environment, Belgrade, Serbia
21. Department of Biology and Ecology, Faculty of Sciences, University of Novi Sad, Novi Sad, Serbia
22. Nature Research Centre, Akademijos Street 2, LT-08412 Vilnius, Lithuania
23. INRA, UR633, Zoologie Forestière (URZF), Orléans, France
24. Freshwater Biodiversity Research Division, Nakdonggang National Institute of Biological Resources, Gyeongsangbuk-do 37242, Republic of Korea.
25. Department of Biology, American University of Beirut, Beirut, Lebanon
26. Provincial Centre of Environmental Research (PCM), Ghent, Belgium
27. cE3c – Centre for Ecology, Evolution and Environmental Changes/Azorean Biodiversity Group and Universidade. dos Açores – Depto de Ciências e Engenharia do Ambiente, Azores, Portugal
28. MARE – Marine and Environmental Sciences Centre, Madeira Island, Portugal
29. Centre of IMAR of the University of the Azores, Department of Oceanography and Fisheries. Horta, Azores, Portugal
30. Smithsonian Environmental Research Center, Edgewater, MD 21037, USA.
31. OKEANOS - Research Center – Universidade dos Açores, Azores, Portugal
32. Department of Biological Sciences, University of Cyprus, Nicosia, Cyprus
33. Scottish Association for Marine Science, Scottish Marine Institute, Oban, U.K.
34. Department of Integrative Marine Ecology, Stazione Zoologica Anton. Dohrn, Villa Comunale, I-80121 Napoli, Italy
35. Biology Department, Ghent University, Ghent, Belgium
36. Austrian Agency for Health and Food Safety, Institute for Sustainable Plant Production, Vienna, Austria
37. Applied and Restoration Ecology Group (IPE-CSIC), Zaragoza (Spain)
38. BioFokus, Oslo, Norway
39. Université Côte d'Azur, CNRS, UMR 7035 ECOSEAS, Nice, France
40. Department of Pharmaceutical Sciences (DISFARM), University of Milan, Milane, Italy
41. Plant Health Laboratory, Anses, Montferrier-sur-Lez, France
42. Department of Biology, Faculty of Science, University of Zagreb, Zagreb, Croatia
43. Leibniz-Institute of Freshwater Ecology and Inland Fisheries (IGB), Berlin, Germany
44. Freie Universität Berlin, Department of Biology, Chemistry, Pharmacy, Institute of Biology, Berlin, Germany
45. Berlin-Brandenburg Institute of Advanced Biodiversity Research (BBIB), Berlin, Germany
46. Unitat de Botànica, Facultat de Ciències, Campus de Montilivi, University of Girona, Girona, Spain
47. Department of Horticulture, Fruit Growing, Botany and Gardening, Agrotecnio, ETSEA, University of Lleida, Spain
48. Department of Forest and Crop Science, Agrotecnio, ETSEA, University of Lleida, Spain
49. Hellenic Centre for Marine Research, Hydrobiological, Rhodes, Greece
50. Department of Biology, Josip Juraj Strossmayer University of Osijek, Osijek, Croatia
51. Department of Marine Sciences, University of the Aegean, Lesvos Island, Greece
52. School of Biological Sciences, Medical and Biological Centre, Queen's University Belfast, UK
53. Centre for Functional Ecology, Department of Life Sciences, University of Coimbra, Coimbra, Portugal
54. Instituto Politécnico de Coimbra, Escola Superior Agrária de Coimbra, Coimbra, Portugal
55. Joint Services Health Unit, RAF Akrotiri, British Forces Cyprus, Cyprus
56. Department of Environmental Sciences, University of Basel, Basel, Switzerland
57. Marine Science and Technology Centre, Klaipeda University, Klaipeda, Lithuania
58. Marine Organism Investigations, Ballina, Killaloe, Ireland
59. Centre for the Research and Technology of Agro-Environmental and Biological Sciences, Department of Biology and Environment, University of Tras-os-Montes and Alto Douro, Vila Real, Portugal
60. Pathology of Woody Plants. Technische Universität München, TUM, Freising, Germany
61. Phytophthora Research Centre, Department of Forest Protection and Wildlife Management, Faculty of Forestry and Wood Technology, Mendel University in Brno; Brno, Czech Republic
62. Slovenian Forestry Institute, Ljubljana, Slovenia
63. Department of Plant Protection, Faculty of Agriculture, Gaziosmanpasa University, Tokat, Turkey
64. Department of Invasion Ecology, Institute of Botany, The Czech Academy of Sciences, Průhonice, Czech Republic
65. Marine Research Centre, Finnish Environment Institute, Helsinki, Finland
66. Environment Agency Austria, Vienna, Austria
67. Simon Fraser University, Burnaby, Canada
68. Sustainable Forest Management Research Institute, University of Valladolid-INIA, Palencia, Spain
69. Swedish University of Agricultural Sciences, Faculty of Forest Sciences, Southern Swedish Forest Research Centre, Alnarp, Sweden
70. Julius Kuehn Institute (JKI), Braunschweig, Germany
71. Faculty of Biology & Institute for Biological Research "Siniša Stanković", University of Belgrade, Belgrade, Serbia
72. cE3c – Centre for Ecology, Evolution and Environmental Changes/Azorean Biodiversity Group and University of the Azores – Faculty of Sciences and Technology, Açores, Portugal
73. Faculty of Fisheries, Muğla Sıtkı Koçman University, Muğla, Turkey
74. University of Forestry, Department of Plant Protection, Sofia, Bulgaria
75. European Commission, Joint Research Centre (JRC), Ispra, Italy
76. Faculty of Agriculture, Çanakkale Onsekiz Mart University, Çanakkale, Turkey
77. National Plant Protection Organization (NPPO), Wageningen,The Netherlands
78. Research Institute For Nature and Forest (INBO), Linkebeek, Belgium
79. Department for Innovation in Biological, Agro-food and Forest systems, University of Tuscia, Viterbo, Italy
80. Natural History Museum, University of Oslo, Oslo, Norway
81. Swiss Federal Research Institute WSL, Biodiversity and Conservation Biology, Birmensdorf, Switzerland
82. CABI, Delémont, Switzerland

**Fig S1.** Spearman correlation matrix and hierarchical cluster of the species rankings for the six protocols common to all taxonomic groups (GISS,GB-NNRA, Harmonia+, EICAT, GABLIS, NGEIAAS) separately calculated for the following species groups: all species, plants, terrestrial invertebrates and aquatic animals (see Table S1 for species in each group). The colour scale indicates the degree of pair-wise correlation between the species rankings obtained for each protocol. In brackets, the mean of all pair-wise Spearman correlations between protocols for each group. See main text for abbreviations.

**
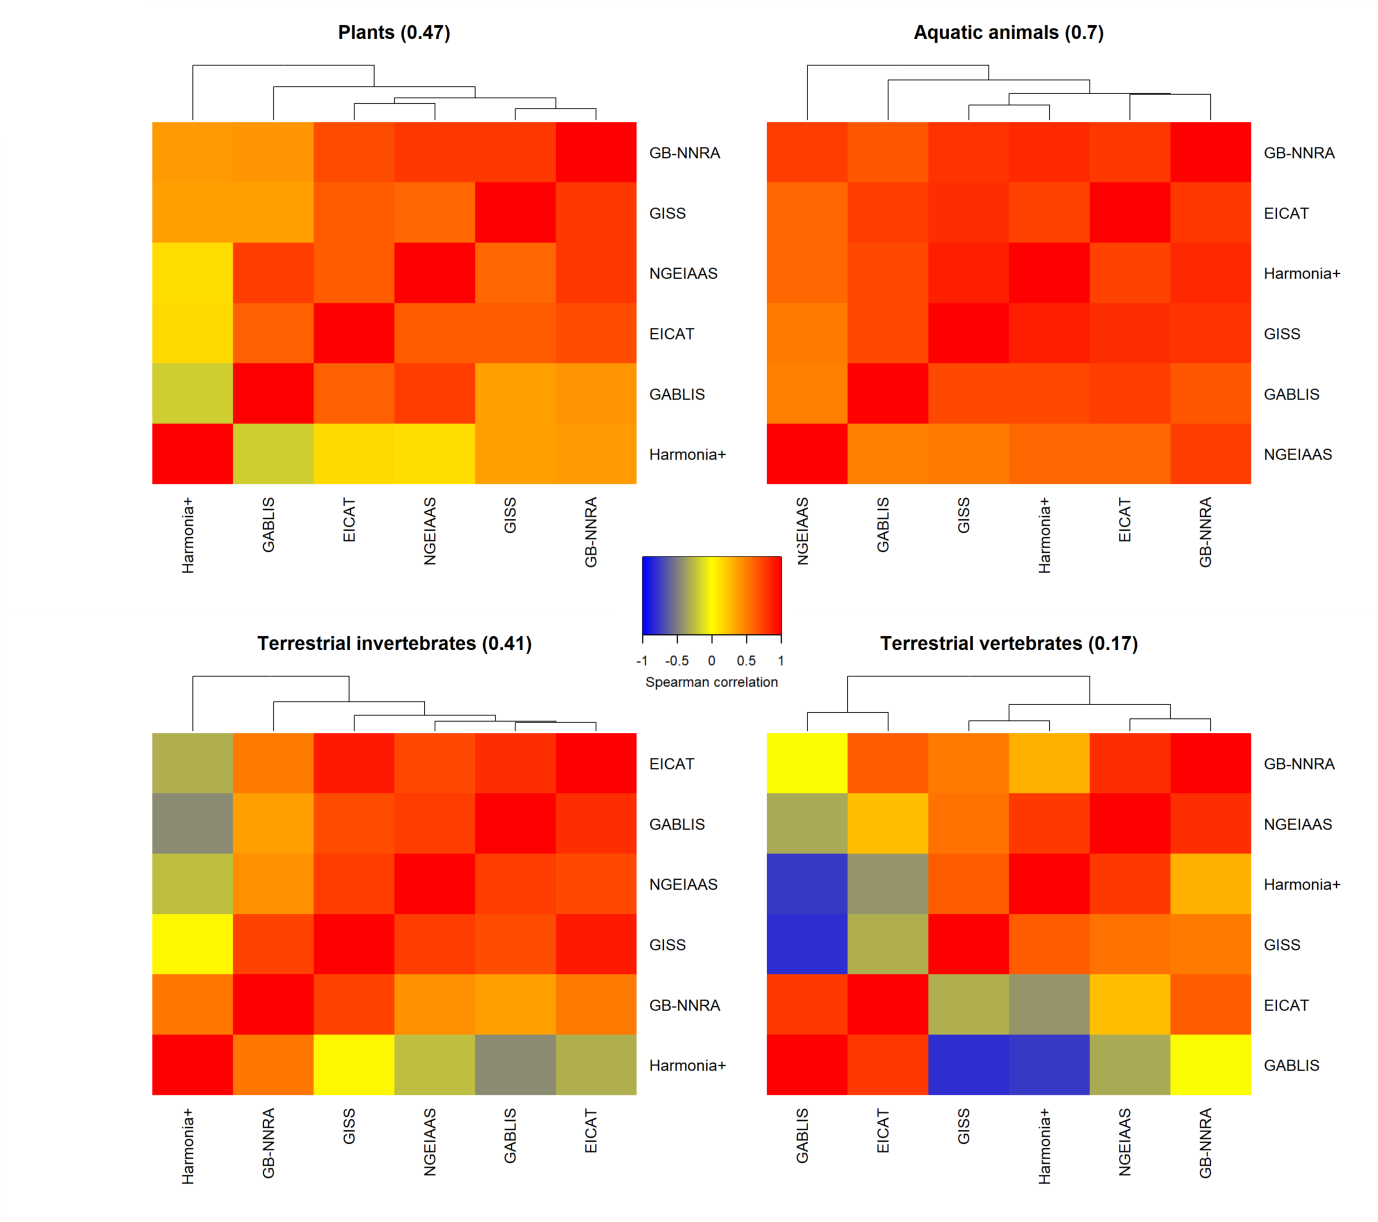
**

**Figure S2.** Spearman correlation matrix and hierarchical cluster of the species scorings for plants and aquatic animals without correcting for sample size bias. The color scale indicates the correlation between the species scorings obtained for each protocol pair. In brackets, the mean of all pairwise correlations per group.

**
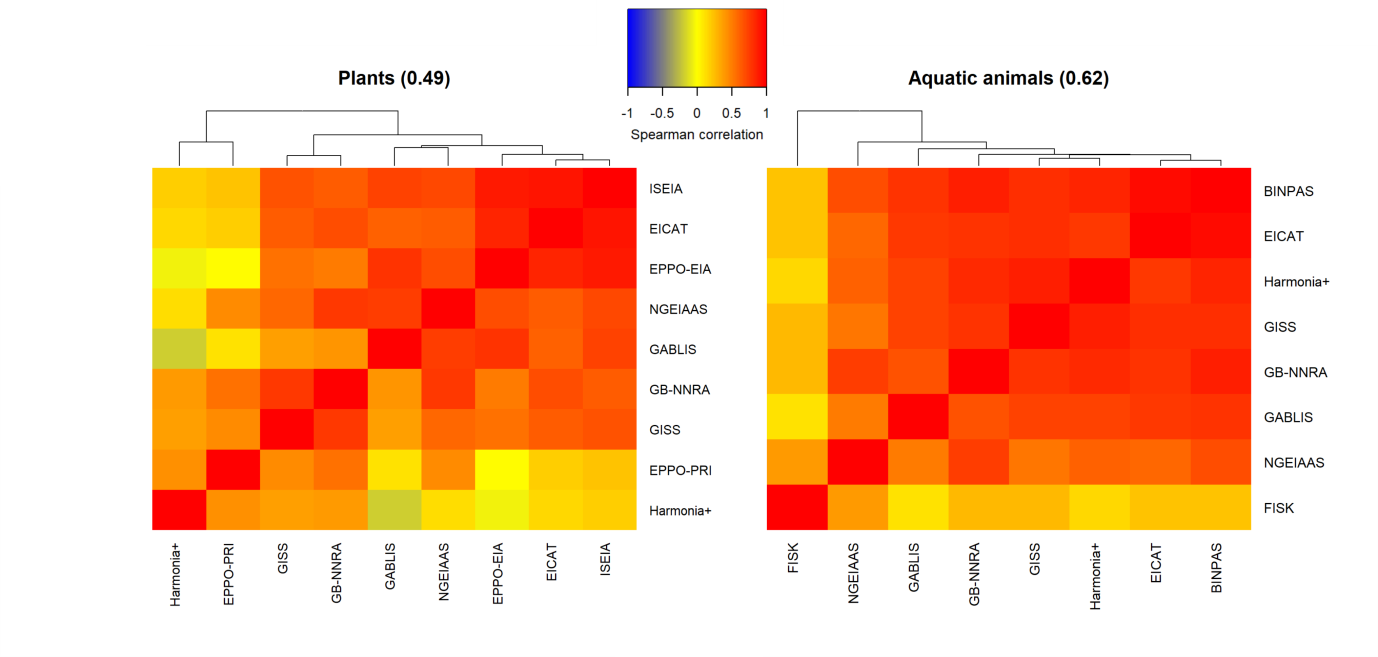
**

**Table S1.** List of non-native species considered in the study grouped by Taxonomic group indicating by columns: the number of independent assessments per protocol, the number of protocols considered for each species, the group with the same protocols considered (Group common protocols), the number of records in the Web of Science (WoS) using the accepted scientific name as a query (Records WoS), the mean and coefficient of variation (CV) of the level of expertise across the assessors that evaluated the species, the number of European countries where the species is considered established according to DASIE database, and whether the species is native to part of Europe (yes/no).

| **Species** | **Number assess. per protocol** | **Group common protocols** | **Records WoS** | **Mean expertise** | **CV expertise** | **Countries DAISIE** | **Native to part of Europe** | **Nu. Protocol** | **BINPAS** | **EICAT** | **EPPO-EIA** | | | **EPPO-PRI** | | **FISK (et al.)** | | **GABLIS** | | | **GB-NNRA** | | | **GISS** | | | **Harmonia+** | | | **ISEIA** | | | **NGEIAAS** | | |
| --- | --- | --- | --- | --- | --- | --- | --- | --- | --- | --- | --- | --- | --- | --- | --- | --- | --- | --- | --- | --- | --- | --- | --- | --- | --- | --- | --- | --- | --- | --- | --- | --- | --- | --- | --- |
| **Freshwater fish** | |  |  |  |  |  |  |  |  | | |  | | |  | |  | |  | | |  | | |  | | |  | | |  | | |  | | |
| *Australoheros facetus* | 6 | Aquatic animals | 22 | 1.17 | 0.35 | 0 | No | 9 | x | x |  | | |  | | x | | x | | | x | | | x | | | x | | | x | | | x | | |
| *Carassius auratus* | 6 | Aquatic animals | 13767 | 2.33 | 0.22 | 8 | No | 9 | x | x |  | | |  | | x | | x | | | x | | | x | | | x | | | x | | | x | | |
| *Oncorhynchus mykiss* | 6 | Aquatic animals | 47437 | 2 | 0.32 | 0 | No | 9 | x | x |  | | |  | | x | | x | | | x | | | x | | | x | | | x | | | x | | |
| **Freshwater invertebrates** | | |  |  |  |  |  |  |  | | | |  | | | | | | |  | | |  | | |  | | |  | | |  | | |  | | |  |  |
| *Dikerogammarus villosus* | 5 | Aquatic animals | 283 | 2 | 0.5 | 7 | No | 9 | x | x |  | | |  | | x | | x | | | x | | | x | | | x | | | x | | | x | | |
| *Dreissena polymorpha* | 5 | Aquatic animals | 6913 | 2.17 | 0.35 | 23 | Yes | 9 | x | x |  | | |  | | x | | x | | | x | | | x | | | x | | | x | | | x | | |
| *Hemimysis anomala* | 5 | Aquatic animals | 111 | 2 | 0.5 | 6 | No | 9 | x | x |  | | |  | | x | | x | | | x | | | x | | | x | | | x | | | x | | |
| *Pomacea canaliculata* | 5 | Aquatic animals | 654 | 1.6 | 0.56 | 0 | No | 8 | x | x |  | | |  | | x | | x | | | x | | | x | | | x | | | x | | | x | | |
| *Procambarus clarkii* | 5 | Aquatic animals | 6879 | 2 | 0.5 | 11 | No | 9 | x | x |  | | |  | | x | | x | | | x | | | x | | | x | | | x | | | x | | |
| **Freshwater plants** | |  |  |  |  |  |  |  |  | | |  | | |  | |  | |  | | |  | | |  | | |  | | |  | | |  | | |
| *Azolla filiculoides* | 7 | Plants | 284 | 1.86 | 0.37 | 17 | No | 9 |  | x | x | | | x | |  | | x | | | x | | | x | | | x | | | x | | | x | | |
| *Eichhornia crassipes* | 6 | Plants | 1781 | 1.83 | 0.41 | 6 | No | 9 |  | x | x | | | x | |  | | x | | | x | | | x | | | x | | | x | | | x | | |
| *Hydrocotyle verticillata* | 6 | Plants | 11 | 1.5 | 0.37 | 1 | No | 9 |  | x | x | | | x | |  | | x | | | x | | | x | | | x | | | x | | | x | | |
| *Myriophyllum heterophyllum* | 8 | Plants | 44 | 1.5 | 0.36 | 2 | No | 9 |  | x | x | | | x | |  | | x | | | x | | | x | | | x | | | x | | | x | | |
| *Pistia stratiotes* | 7 | Plants | 572 | 1.43 | 0.55 | 3 | No | 9 |  | x | x | | | x | |  | | x | | | x | | | x | | | x | | | x | | | x | | |
| **Insects** |  |  |  |  |  |  |  |  |  |  |  | | |  | |  | |  | | |  | | |  | | |  | | |  | | |  | | |
| *Aedes albopictus* | 5 | Terr. invertebrates | 9803 | 1.8 | 0.25 | 19 | No | 7 |  | x |  | | |  | |  | | x | | | x | | | x | | | x | | | x | | | x | | |
| *Anoplophora chinensis* | 5 | Terr. invertebrates | 60 | 2 | 0.5 | 4 | No | 8 |  | x | x | | |  | |  | | x | | | x | | | x | | | x | | | x | | | x | | |
| *Cameraria ohridella* | 5 | Terr. invertebrates | 394 | 2.2 | 0.38 | 12 | No | 8 |  | x | x | | |  | |  | | x | | | x | | | x | | | x | | | x | | | x | | |
| **Species** | **Number assess. per protocol** | **Group common protocols** | **Records WoS** | **Mean expertise** | **CV expertise** | **Countries DAISIE** | **Native to part of Europe** | **Nu. Protocol** | **BINPAS** | **EICAT** | **EPPO-EIA** | | | **EPPO-PRI** | | **FISK (et al.)** | | **GABLIS** | | | **GB-NNRA** | | | **GISS** | | | **Harmonia+** | | | **ISEIA** | | | **NGEIAAS** | | |
| *Cydalima perspectalis* | 5 | Terr. invertebrates | 52 | 2.17 | 0.19 | 10 | No | 8 |  | x | x | | |  | |  | | x | | | x | | | x | | | x | | | x | | | x | | |
| *Diabrotica virgifera* | 5 | Terr. invertebrates | 1202 | 1.8 | 0.61 | 16 | No | 8 |  | x | x | | |  | |  | | x | | | x | | | x | | | x | | | x | | | x | | |
| *Drosophila suzukii* | 7 | Terr. invertebrates | 219 | 1.67 | 0.31 | 6 | No | 8 |  | x | x | | |  | |  | | x | | | x | | | x | | | x | | | x | | | x | | |
| *Dryocosmus kuriphilus* | 5 | Terr. invertebrates | 218 | 2 | 0.5 | 7 | No | 8 |  | x | x | | |  | |  | | x | | | x | | | x | | | x | | | x | | | x | | |
| *Harmonia axyridis* | 6 | Terr. invertebrates | 1592 | 2.5 | 0.22 | 28 | No | 7 |  | x |  | | |  | |  | | x | | | x | | | x | | | x | | | x | | | x | | |
| *Leptinotarsa decemlineata* | 5 | Terr. invertebrates | 2941 | 1 | 0 | 38 | No | 8 |  | x | x | | |  | |  | | x | | | x | | | x | | | x | | | x | | | x | | |
| *Leptoglossus occidentalis* | 6 | Terr. invertebrates | 195 | 2 | 0.45 | 12 | No | 8 |  | x | x | | |  | |  | | x | | | x | | | x | | | x | | | x | | | x | | |
| *Linepithema humile* | 6 | Terr. invertebrates | 761 | 2 | 0.45 | 15 | No | 7 |  | x |  | | |  | |  | | x | | | x | | | x | | | x | | | x | | | x | | |
| *Tuta absoluta* | 5 | Terr. invertebrates | 446 | 1.8 | 0.46 | 26 | No | 8 |  | x | x | | |  | |  | | x | | | x | | | x | | | x | | | x | | | x | | |
| *Vespa velutina* | 6 | Terr. invertebrates | 129 | 1.17 | 0.35 | 1 | No | 7 |  | x |  | | |  | |  | | x | | | x | | | x | | | x | | | x | | | x | | |
| **Marine** |  |  |  |  |  |  |  |  |  |  |  | | |  | |  | |  | | |  | | |  | | |  | | |  | | |  | | |
| *Caulerpa cylindracea* | 5 | Algae | 107 | 2 | 0.5 | 11 | No | 7 | x | x |  | | |  | |  | | x | | | x | | | x | | | x | | |  | | | x | | |
| *Conomurex persicus* | 5 | Aquatic animals | 18 | 2 | 0.45 | 0 | No | 8 | x | x |  | | |  | | x | | x | | | x | | | x | | | x | | |  | | | x | | |
| *Crepidula fornicata* | 5 | Aquatic animals | 710 | 2.2 | 0.38 | 15 | No | 8 | x | x |  | | |  | | x | | x | | | x | | | x | | | x | | |  | | | x | | |
| *Mnemiopsis leidyi* | 5 | Aquatic animals | 813 | 2 | 0.5 | 6 | No | 8 | x | x |  | | |  | | x | | x | | | x | | | x | | | x | | |  | | | x | | |
| *Percnon gibbesi* | 5 | Aquatic animals | 71 | 2.2 | 0.38 | 4 | No | 8 | x | x |  | | |  | | x | | x | | | x | | | x | | | x | | |  | | | x | | |
| *Plotosus lineatus* | 5 | Aquatic animals | 89 | 1.5 | 0.56 | 1 | No | 8 | x | x |  | | |  | | x | | x | | | x | | | x | | | x | | |  | | | x | | |
| *Rapana venosa* | 5 | Aquatic animals | 287 | 1.8 | 0.61 | 5 | No | 8 | x | x |  | | |  | | x | | x | | | x | | | x | | | x | | |  | | | x | | |
| *Rhopilema nomadica* | 5 | Aquatic animals | 43 | 1.67 | 0.49 | 4 | No | 8 | x | x |  | | |  | | x | | x | | | x | | | x | | | x | | |  | | | x | | |
| *Siganus luridus* | 6 | Aquatic animals | 118 | 2.5 | 0.22 | 10 | No | 8 | x | x |  | | |  | | x | | x | | | x | | | x | | | x | | |  | | | x | | |
| *Stephanolepis diaspros* | 5 | Aquatic animals | 24 | 2 | 0.5 | 11 | No | 8 | x | x |  | | |  | | x | | x | | | x | | | x | | | x | | |  | | | x | | |
| **Other terrestrial insects** | | |  |  |  |  |  |  |  | | | |  | | | | | | |  | | |  | | |  | | |  | | |  | | |  | | |  |  |
| *Arion vulgaris (=lusitanicus)* | 5 | Terr. invertebrates | 320 | 1.8 | 0.61 | 10 | Yes | 8 |  | x | x | | |  | |  | | x | | | x | | | x | | | x | | | x | | | x | | |
| *Arthurdendyus triangulatus* | 5 | Terr. invertebrates | 37 | 1 | 0 | 0 | No | 8 |  | x | x | | |  | |  | | x | | | x | | | x | | | x | | | x | | | x | | |
| *Bursaphelenchus xylophilus* | 5 | Terr. invertebrates | 1365 | 1 | 0 | 3 | No | 8 |  | x | x | | |  | |  | | x | | | x | | | x | | | x | | | x | | | x | | |
| *Fascioloides magna* | 5 | Terr. invertebrates | 298 | 1.4 | 0.64 | 2 | No | 8 |  | x | x | | |  | |  | | x | | | x | | | x | | | x | | | x | | | x | | |
| **Species** | **Number assess. per protocol** | **Group common protocols** | **Records WoS** | **Mean expertise** | **CV expertise** | **Countries DAISIE** | **Native to part of Europe** | **Nu. Protocol** | **BINPAS** | **EICAT** | **EPPO-EIA** | | | **EPPO-PRI** | | **FISK (et al.)** | | **GABLIS** | | | **GB-NNRA** | | | **GISS** | | | **Harmonia+** | | | **ISEIA** | | | **NGEIAAS** | | |
| **Pathogens** | |  |  |  |  |  |  |  |  | | |  | | |  | |  | |  | | |  | | |  | | |  | | |  | | |  | | |
| *Hymenoscyphus fraxineus* | 5 | Pathogen | 78 | 2 | 0.45 | 0 | No | 8 |  | x | x | | |  | |  | | x | | | x | | | x | | | x | | | x | | | x | | |
| *Phytophthora alni* | 6 | Pathogen | 47 | 2.17 | 0.19 | 19 | No | 8 |  | x | x | | |  | |  | | x | | | x | | | x | | | x | | | x | | | x | | |
| *Phytophthora plurivora* | 7 | Pathogen | 30 | 1.86 | 0.37 | 0 | No | 8 |  | x | x | | |  | |  | | x | | | x | | | x | | | x | | | x | | | x | | |
| **Terrestrial plants** | |  |  |  |  |  |  |  |  | | |  | | |  | |  | |  | | |  | | |  | | |  | | |  | | |  | | |
| *Acacia dealbata* | 5 | Plants | 182 | 2 | 0.35 | 8 | No | 9 |  | x | x | | | x | |  | | x | | | x | | | x | | | x | | | x | | | x | | |
| *Ambrosia artemisiifolia* | 8 | Plants | 1049 | 2.25 | 0.31 | 14 | No | 9 |  | x | x | | | x | |  | | x | | | x | | | x | | | x | | | x | | | x | | |
| *Baccharis halimifolia* | 5 | Plants | 103 | 1.6 | 0.56 | 5 | No | 9 |  | x | x | | | x | |  | | x | | | x | | | x | | | x | | | x | | | x | | |
| *Cortaderia selloana* | 5 | Plants | 53 | 1.8 | 0.46 | 8 | No | 9 |  | x | x | | | x | |  | | x | | | x | | | x | | | x | | | x | | | x | | |
| *Heracleum mantegazzianum* | 6 | Plants | 175 | 2 | 0.45 | 17 | No | 9 |  | x | x | | | x | |  | | x | | | x | | | x | | | x | | | x | | | x | | |
| *Lupinus polyphyllus* | 5 | Plants | 178 | 1.4 | 0.39 | 16 | No | 9 |  | x | x | | | x | |  | | x | | | x | | | x | | | x | | | x | | | x | | |
| *Opuntia ficus-indica* | 6 | Plants | 1604 | 2 | 0.32 | 12 | No | 9 |  | x | x | | | x | |  | | x | | | x | | | x | | | x | | | x | | | x | | |
| *Robinia pseudoacacia* | 6 | Plants | 1583 | 2.33 | 0.22 | 32 | No | 9 |  | x | x | | | x | |  | | x | | | x | | | x | | | x | | | x | | | x | | |
| *Sicyos angulatus* | 5 | Plants | 49 | 1.8 | 0.46 | 3 | No | 9 |  | x | x | | | x | |  | | x | | | x | | | x | | | x | | | x | | | x | | |
| *Solanum elaeagnifolium* | 5 | Plants | 146 | 1.4 | 0.39 | 6 | No | 9 |  | x | x | | | x | |  | | x | | | x | | | x | | | x | | | x | | | x | | |
| **Terrestrial vertebrates** | | |  |  |  |  |  |  |  | | | |  | | | | | | |  | | |  | | |  | | |  | | |  | | |  | | |  |  |
| *Lithobates catesbeianus* | 5 | Terr. Vertebrates | 380 | 1.8 | 0.46 | 8 | No | 7 |  | x |  | | |  | |  | | x | | | x | | | x | | | x | | | x | | | x | | |
| *Psittacula krameri* | 5 | Terr. Vertebrates | 500 | 1.6 | 0.34 | 18 | No | 7 |  | x |  | | |  | |  | | x | | | x | | | x | | | x | | | x | | | x | | |
| *Threskiornis aethiopicus* | 6 | Terr. Vertebrates | 119 | 1.33 | 0.39 | 2 | No | 7 |  | x |  | | |  | |  | | x | | | x | | | x | | | x | | | x | | | x | | |
| *Trachemys scripta* | 5 | Terr. Vertebrates | 1612 | 1.6 | 0.34 | 15 | No | 7 |  | x |  | | |  | |  | | x | | | x | | | x | | | x | | | x | | | x | | |

*Abbreviations. Terr.: terrestrial; WoS: Web of Science; CV: Coefficient of Variation*

**Table S2.** Pearson correlation coefficients among the continuous variables used in the regression analyses to explain the coefficient of variation of scores across assessors with species and protocol characteristics. Significance values: ***P*<0.01, *** *P*<0.001

|  | Number of questions | Records WoS | Expertise required | Mean assessor expertise |
| --- | --- | --- | --- | --- |
| Records WoS | 0.04 |  |  |  |
| Expertise required | **0.51***** | 0.03 |  |  |
| Mean assessor expertise | 0.05 | **0.15**** | 0.05 |  |
| CV assessor expertise | 0.04 | **-0.16***** | 0.03 | 0.09* |
| *WoS: Web of Science; CV: Coefficient of Variation* | | | | |
